# Supplementary material for: Developmental stages in microbiota, bile acids, and clostridial species in healthy puppies
Source: PubMed Central journal article supplement (PMC7694855; doi:10.1111/jvim.15928), 2020-10-13
Supplement: JVIM-34-2345-s001.pdf [file JVIM-34-2345-s001.pdf]

# The fecal microbiome and metabolome in healthy dogs and cats

|                                   |                  |                          |                                 |                                    |                              |   |   |
|-----------------------------------|------------------|--------------------------|---------------------------------|------------------------------------|------------------------------|---|---|
| Fecal sample                      | Collection date: | Storage until delivered: | <input type="radio"/> room temp | <input type="radio"/> refrigerated | <input type="radio"/> frozen |   |   |
| Fecal score <u>(lab use only)</u> | 1                | 2                        | 3                               | 4                                  | 5                            | 6 | 7 |

## Patient Information

|              |              |
|--------------|--------------|
| Today's date | Owner email: |
| Pet's name   | Owner name:  |

## Signalment

|                                   |                                   |                            |                                       |                  |   |   |   |   |   |
|-----------------------------------|-----------------------------------|----------------------------|---------------------------------------|------------------|---|---|---|---|---|
| Species                           | <input type="radio"/> dog         | <input type="radio"/> cat  | Breed:                                |                  |   |   |   |   |   |
| Age (years)*                      |                                   |                            |                                       |                  |   |   |   |   |   |
| How long have you owned your pet? | Where is your pet primarily kept? |                            |                                       |                  |   |   |   |   |   |
| Sex                               | <input type="radio"/> female      | <input type="radio"/> male | <input type="radio"/> spayed/neutered |                  |   |   |   |   |   |
| Body weight*                      | Kg                                | lbs                        | Date of last vaccination:             |                  |   |   |   |   |   |
| BCS*                              | 1                                 | 2                          | 3                                     | 4 (ideal - dogs) | 5 | 6 | 7 | 8 | 9 |

\* at sample collection

## History of current condition

**At the time** the fecal sample was collected

|                                           |                                         |                                                                                    |                                                                                    |                                         |                                |                              |
|-------------------------------------------|-----------------------------------------|------------------------------------------------------------------------------------|------------------------------------------------------------------------------------|-----------------------------------------|--------------------------------|------------------------------|
| GI disease                                | <input type="radio"/> no                | <input type="radio"/> yes, acute<br>(GI signs, including weight loss, < 3 weeks)   | <input type="radio"/> yes, chronic<br>(GI signs, including weight loss, > 3 weeks) |                                         |                                |                              |
| Appetite                                  | <input type="radio"/> normal            | <input type="radio"/> decreased                                                    | <input type="radio"/> increased                                                    | <input type="radio"/> mild              | <input type="radio"/> moderate | <input type="radio"/> severe |
| Attitude/Activity                         | <input type="radio"/> normal            | <input type="radio"/> decreased                                                    | <input type="radio"/> mild                                                         | <input type="radio"/> moderate          | <input type="radio"/> severe   |                              |
| Vomiting                                  | <input type="radio"/> no                | <input type="radio"/> less than 1x/week                                            | <input type="radio"/> 1-2x/week                                                    | <input type="radio"/> more than 2x/week |                                |                              |
| Diarrhea                                  | <input type="radio"/> no                | <input type="radio"/> less than 1x/week                                            | <input type="radio"/> 1-2x/week                                                    | <input type="radio"/> more than 2x/week |                                |                              |
| Weight loss                               | <input type="radio"/> none              | <input type="radio"/> mild                                                         | <input type="radio"/> moderate                                                     | <input type="radio"/> severe            |                                |                              |
| Any medications                           | <input type="radio"/> none              | <input type="radio"/> yes (please specify)                                         |                                                                                    |                                         |                                |                              |
| Any antibiotic use in the last 30 days    | <input type="radio"/> none              | <input type="radio"/> yes (please specify which antibiotic and for what condition) |                                                                                    |                                         |                                |                              |
| Any antibiotic use in the last 6 months   | <input type="radio"/> none              | <input type="radio"/> yes (please specify which antibiotic and for what condition) |                                                                                    |                                         |                                |                              |
| Any antibiotic use ever                   | <input type="radio"/> none              | <input type="radio"/> yes (please specify which antibiotic and for what condition) |                                                                                    |                                         |                                |                              |
| Any pre-existing conditions/allergies     | <input type="radio"/> none              | <input type="radio"/> yes (please specify)                                         |                                                                                    |                                         |                                |                              |
| When did the first clinical sign(s) start | about _____ days/ weeks/month/years ago |                                                                                    |                                                                                    |                                         |                                |                              |

|             |                                                                                                                 |
|-------------|-----------------------------------------------------------------------------------------------------------------|
| <b>Diet</b> | <input type="radio"/> Dry food (type: Purina Savor, Royal Canin Satiety, etc.)                                  |
|             | <input type="radio"/> Wet food (type: Purina Savor, Royal Canin Satiety, etc.)                                  |
|             | <input type="radio"/> Homemade diet (please include what you feed, ex: chicken, rice, etc.)                     |
|             | <input type="radio"/> Raw food (type: Countrypet Duck recipe, etc or what you feed, ex: chicken, carrots, etc.) |
|             | <input type="radio"/> Pre- or Pro- biotics (include brand name)                                                 |
|             | <input type="radio"/> Other, please explain:                                                                    |
|             | <input type="radio"/> Length of time your pet has been on this diet/diets:                                      |

### Previous History

|                                                      |                              |                                            |                                 |                                         |                                |                               |
|------------------------------------------------------|------------------------------|--------------------------------------------|---------------------------------|-----------------------------------------|--------------------------------|-------------------------------|
| <b>Date (approximate)</b>                            |                              |                                            |                                 |                                         |                                |                               |
| <b>Appetite</b>                                      | <input type="radio"/> normal | <input type="radio"/> decreased            | <input type="radio"/> increased | <input type="radio"/> mild              | <input type="radio"/> moderate | <input type="radio"/> severe  |
| <b>Attitude/Activity</b>                             | <input type="radio"/> normal | <input type="radio"/> decreased            | <input type="radio"/> mild      |                                         | <input type="radio"/> moderate | <input type="radio"/> severe  |
| <b>Vomiting</b>                                      | <input type="radio"/> no     | <input type="radio"/> less than 1x/week    | <input type="radio"/> 1-2x/week | <input type="radio"/> more than 2x/week |                                |                               |
| <b>Diarrhea</b>                                      | <input type="radio"/> no     | <input type="radio"/> less than 1x/week    | <input type="radio"/> 1-2x/week | <input type="radio"/> more than 2x/week |                                |                               |
| <b>Weight loss</b>                                   | <input type="radio"/> none   | <input type="radio"/> mild                 | <input type="radio"/> moderate  | <input type="radio"/> severe            |                                |                               |
| <b>Weight gain</b>                                   | <input type="radio"/> none   | <input type="radio"/> mild                 | <input type="radio"/> moderate  | <input type="radio"/> severe            |                                |                               |
| <b>Does your pet ever itch excessively:</b>          | <input type="radio"/> none   | <input type="radio"/> lick                 | <input type="radio"/> chew      | <input type="radio"/> head shake        | <input type="radio"/> rub      | <input type="radio"/> scratch |
| <b>How often is your pet itchy:</b>                  | <input type="radio"/> none   | <input type="radio"/> mild                 | <input type="radio"/> moderate  | <input type="radio"/> severe            |                                |                               |
| <b>Parasite history-including giardia</b>            | <input type="radio"/> none   | <input type="radio"/> yes (please specify) |                                 |                                         |                                |                               |
| <b>Ever had pancreatitis</b>                         | <input type="radio"/> none   | <input type="radio"/> yes (please specify) |                                 |                                         |                                |                               |
| <b>Any pre- existing conditions</b>                  | <input type="radio"/> none   | <input type="radio"/> yes (please specify) |                                 |                                         |                                |                               |
| <b>Any disease as a puppy (ex: Parvovirus, etc.)</b> | <input type="radio"/> none   | <input type="radio"/> yes (please specify) |                                 |                                         |                                |                               |

Is there anything else that you would like to add or let us know about your pet?
