# Supplementary material for: Developmental stages in microbiota, bile acids, and clostridial species in healthy puppies
Source: PubMed Central journal article supplement (PMC7694855; doi:10.1111/jvim.15928), 2020-10-13
Supplement: JVIM-34-2345-s002.pdf [file JVIM-34-2345-s002.pdf]

|                                         | >52 weeks                   | 1-2 weeks                              | 3-4 weeks                             | 5-6 weeks                             | 7-9 weeks                           | 10-16 weeks                    | 20-48 weeks                   |
|-----------------------------------------|-----------------------------|----------------------------------------|---------------------------------------|---------------------------------------|-------------------------------------|--------------------------------|-------------------------------|
| total bacteria                          | 11.08 [10.65-11.25]         | 11.13 [7.6-11.45];<br>p>.999           | 11.28 [11.09-11.53];<br><b>p=.045</b> | 11.32 [11.04-11.56];<br><b>p=.020</b> | 11.18 [10.74-11.41];<br>p>.999      | 10.63 [10.40-11.20];<br>p=.170 | 10.90 [10.27-11.2];<br>p>.999 |
| <i>Faecalibacterium</i> spp.            | 7.34 [3.81-8.19]            | 3.80 [2.70-4.59];<br><b>p&lt;.001</b>  | 2.93 [2.48-4.19];<br><b>p&lt;.001</b> | 4.28 [1.07-7.69];<br><b>p=.016</b>    | 6.40 [1.07-7.63];<br>p=.506         | 6.35 [4.62-7.36];<br>p=.585    | 7.08 [5.04-7.73];<br>p>.999   |
| <i>Turicibacter</i> spp.                | 6.81 [5.31-7.82]            | 3.22 [2.31-6.33];<br><b>p&lt;.001</b>  | 4.12 [2.7-5.17];<br><b>p&lt;.001</b>  | 5.41 [4.33-8.35];<br>p>.999           | 7.54 [6.14-8.54];<br>p>.999         | 5.45 [4.77-8.03];<br>p=.782    | 6.64 [5.40-7.94];<br>p>.999   |
| <i>Streptococcus</i> spp.               | 3.03 [1.66-5.98]            | 5.18 [1.97-7.53];<br>p=.178            | 5.58 [1.45-8.13];<br><b>p=.027</b>    | 8.00 [6.35-8.96];<br><b>p&lt;.001</b> | 6.03 [3.60-7.47];<br><b>p=.007</b>  | 4.22 [2.98-7.37];<br>p>.999    | 4.13 [1.94-6.58];<br>p>.999   |
| <i>Escherichia coli</i>                 | 4.19 [.88-8.06]             | 8.53 [1.65-9.14];<br><b>p=.005</b>     | 8.51 [7.90-9.11];<br><b>p&lt;.001</b> | 7.48 [6.15-8.69];<br><b>p=.018</b>    | 7.12 [5.42-8.72];<br><b>p=.027</b>  | 5.39 [3.46-7.17];<br>p>.999    | 5.01 [2.84-6.93];<br>p>.999   |
| <i>Blautia</i> spp.                     | 10.18 [9.66-10.64]          | 7.92 [6.96-10.08];<br><b>p&lt;.001</b> | 9.96 [8.42-10.67];<br>p>.999          | 10.52 [9.2-11.15];<br>p>.999          | 10.30 [9.50-11.04];<br>p>.999       | 9.86 [9.49-10.70];<br>p>.999   | 10.14 [9.21-10.75];<br>p>.999 |
| <i>Fusobacterium</i> spp.               | 9.45 [6.05-10.14]           | 8.41 [4.92-9.1];<br><b>p=.003</b>      | 8.26 [7.58-10.03];<br>p=.229          | 8.45 [7.18-10.05];<br>p=.111          | 8.94 [6.61-9.90];<br>p=.220         | 8.40 [7.73-9.65];<br>p=.157    | 8.91 [6.69-9.74];<br>p=.822   |
| <i>Clostridium hiranonis</i>            | 6.02 [5.06-7.00]            | .01 [.01-5.51];<br><b>p&lt;.001</b>    | .01 [.01-.68];<br><b>p&lt;.001</b>    | .84 [.01-6.71];<br><b>p=.005</b>      | 6.36 [.01-6.96];<br>p>.999          | 6.23 [.01-6.78];<br>p>.999     | 6.29 [5.47-6.96];<br>p>.999   |
| Dysbiosis Index                         | -4.62 [-8.36--.61]          | 5.28 [2.13-8.27];<br><b>p&lt;.001</b>  | 6.69 [1.88-8.83];<br><b>p&lt;.001</b> | 5.39 [1.32-8.6];<br><b>p&lt;.001</b>  | -5.59 [-3.41-6.01];<br>p=.052       | -3.47 [-6.56-5.01]; p>.999     | -4.09 [-6.75-.2]; p>.999      |
| <i>C. perfringens</i> NetF toxin        | undetectable in all samples |                                        |                                       |                                       |                                     |                                |                               |
| <i>C. perfringens</i> 16S rRNA          | 1.13 [1.13-5.28]            | 6.48 [2.51-7.75];<br><b>p&lt;.001</b>  | 6.26 [4.96-7.63];<br><b>p&lt;.001</b> | 6.53 [2.92-7.86];<br><b>p&lt;.001</b> | 5.69 [2.92-8.33];<br><b>p=.002</b>  | 2.54 [1.13-4.62];<br>p>.999    | 3.23 [1.13-5.11];<br>p>.999   |
| <i>C. difficile</i> 16S rRNA            | .01 [.01-.01]               | 3.96 [.01-5.24];<br><b>p&lt;.001</b>   | 4.85 [3.86-5.86];<br><b>p&lt;.001</b> | 4.1 [.01-4.85];<br><b>p&lt;.001</b>   | .01 [.01-2.18];<br>p>.999           | .01 [.01-.01];<br>p>.999       | .01 [.01-.01];<br>p>.999      |
| <i>C. perfringens</i> enterotoxin (CPE) | 1.84 [1.84-8.15]            | 1.84 [1.84-1.84];<br><b>p=.014</b>     | 1.84 [1.84-6.21];<br>p=.305           | 1.84 [1.84-1.84];<br><b>p=.017</b>    | 1.84 [1.84-3.85];<br>p=.279         | 1.84 [1.84-3.89];<br>p=.523    | 2.29 [1.84-5.30];<br>p>.999   |
| <i>Salmonella</i> spp.                  | .01 [.01-.01]               | .01 [.01-.01];<br>p>.999               | .01 [.01-.01];<br>p>.999              | .01 [.01-3.21];<br>p=.612             | .01 [.01-3.33];<br>p=.078           | not measured                   | not measured                  |
| <i>Campylobacter jejuni</i>             | undetectable in all samples |                                        |                                       |                                       |                                     |                                |                               |
| Cholic Acid                             | .13 [.01-1.88]              | .59 [.06-4];<br>p=.500                 | 1.34 [.12-4.2];<br><b>p=.003</b>      | 2.12 [.8-5.61];<br><b>p&lt;.001</b>   | .65 [.05-3.08];<br>p=.173           | .22 [.03-1.76];<br>p>.999      | .42 [.03-3.56];<br>p>.999     |
| Chenodeoxycholic Acid                   | .07 [.01-.4]                | .26 [.01-.78];<br>p=.670               | .37 [.09-2.62];<br><b>p=.021</b>      | 1.24 [.54-1.79];<br><b>p&lt;.001</b>  | .70 [.09-1.95];<br><b>p&lt;.001</b> | .18 [.01-1.00];<br>p=.811      | .36 [.01-1.12];<br>p>.999     |
| Lithocholic Acid                        | .71 [.04-1.38]              | .04 [.02-.12];<br><b>p&lt;.001</b>     | .05 [.02-.07];<br><b>p&lt;.001</b>    | .06 [.04-.97];<br><b>p=.050</b>       | .75 [.02-1.36];<br>p>.999           | .36 [.05-1.70];<br>p>.999      | .38 [.16-.92];<br>p>.999      |
| Deoxycholic Acid                        | 3.53 [.24-7.54]             | .22 [.07-.28];<br><b>p&lt;.001</b>     | .24 [.08-.30];<br><b>p&lt;.001</b>    | .26 [.22-3.75];<br><b>p=.001</b>      | 2.42 [.22-6.08];<br>p>.999          | 1.68 [.22-4.09];<br>p=.912     | 1.91 [1.00-3.51];<br>p>.999   |
| Ursodeoxycholic Acid                    | .02 [0-.08]                 | .03 [0-.44];<br>p>.999                 | .19 [.01-1.51];<br><b>p=.003</b>      | .26 [.01-.82];<br><b>p&lt;.001</b>    | .23 [.02-.91];<br><b>p&lt;.001</b>  | .06 [0-.30];<br>p>.999         | .08 [.01-.16];<br>p>.999      |

|                           |                     |                                         |                                          |                                          |                                       |                                |                                |
|---------------------------|---------------------|-----------------------------------------|------------------------------------------|------------------------------------------|---------------------------------------|--------------------------------|--------------------------------|
| Total Primary Bile Acid   | .26 [.03-2.14]      | .90 [.08-4.43];<br>p=.481               | 1.78 [.20-6.82];<br><b>p=.003</b>        | 3.27 [1.34-7.23];<br><b>p&lt;.001</b>    | 1.32 [.14-5.03];<br><b>p=.017</b>     | .40 [.05-2.56];<br>p>.999      | .78 [.04-4.67];<br>p>.999      |
| Total Secondary Bile Acid | 4.12 [.32-8.94]     | .29 [.10-.75];<br><b>p&lt;.001</b>      | .45 [.13-1.86];<br><b>p&lt;.001</b>      | .61 [.28-5.06];<br><b>p=.006</b>         | 3.48 [.82-7.94];<br>p>.999            | 1.94 [.56-5.85];<br>p>.999     | 2.30 [1.47-4.33];<br>p>.999    |
| Total Bile Acid           | 5.09 [2.04-9.31]    | 1.34 [.18-4.58];<br><b>p&lt;.001</b>    | 2.34 [.78-7.29];<br>p=.064               | 5.06 [1.87-8.31];<br>p>.999              | 4.92 [3.77-9.09];<br>p>.999           | 3.12 [1.82-6.00];<br>p=.637    | 5.10 [1.86-6.26];<br>p>.999    |
| % Secondary Bile Acid     | 95.43 [13.02-99.22] | 22.13 [3.29-82.61];<br><b>p&lt;.001</b> | 20.57 [6.44-74.01];<br><b>p&lt;.001</b>  | 15.44 [5.85-60.89];<br><b>p&lt;.001</b>  | 75.80 [16.58-96.46];<br>p=.375        | 91.57 [18.05-97.52];<br>p>.999 | 79.05 [25.36-98.16];<br>p>.999 |
| % Primary Bile Acid       | 4.57 [.79-86.98]    | 77.87 [17.4-96.71];<br><b>p&lt;.001</b> | 79.43 [25.99-93.56];<br><b>p&lt;.001</b> | 84.56 [39.11-94.15];<br><b>p&lt;.001</b> | 24.20 [3.54-83.42];<br>p=.375         | 8.43 [2.48-81.95];<br>p>.999   | 20.95 [1.84-74.64];<br>p>.999  |
| % Cholic Acid             | 2.31 [.44-76.52]    | 43.22 [15.25-87.4];<br><b>p=.001</b>    | 60.32 [15.1-79.32];<br><b>p&lt;.001</b>  | 54.61 [20.47-74.24];<br><b>p&lt;.001</b> | 11.77 [1.17-51.91];<br>p>.999         | 5.67 [.64-53.91];<br>p>.999    | 10.42 [1.26-56.78];<br>p>.999  |
| % Chenodeoxycholic Acid   | 1.89 [.2-10.46]     | 15.19 [1.84-59.93];<br><b>p&lt;.001</b> | 20.8 [7.61-35.96];<br><b>p&lt;.001</b>   | 28.74 [18.64-35.98];<br><b>p&lt;.001</b> | 13.61 [2.38-32.42];<br><b>p=.003</b>  | 3.77 [.58-29.36];<br>p=.343    | 7.04 [0.58-17.86];<br>p>.999   |
| % Lithocholic Acid        | 13.8 [1.7-34.87]    | 3.22 [.39-14.66];<br><b>p=.036</b>      | 1.59 [.63-3.38];<br><b>p&lt;.001</b>     | 1.43 [.71-11.67];<br><b>p&lt;.001</b>    | 13.7 [.32-27.98];<br>p>.999           | 14.17 [1.54-33.77];<br>p>.999  | 15.17 [2.49-27.99];<br>p>.999  |
| % Deoxycholic Acid        | 74.45 [9.77-85.73]  | 13.01 [2.49-37.62];<br><b>p&lt;.001</b> | 6.61 [2.74-13.71];<br><b>p&lt;.001</b>   | 6.71 [3.44-45.11];<br><b>p&lt;.001</b>   | 49.61 [4.55-67.22];<br>p=.133         | 59.43 [7.15-85.05];<br>p>.999  | 62.51 [21.53-81.81];<br>p>.999 |
| % Ursodeoxycholic Acid    | .36 [.03-3.16]      | 2.48 [.36-40.26];<br><b>p=.014</b>      | 6.95 [.12-59.83];<br><b>p&lt;.001</b>    | 4.11 [.55-16.18];<br><b>p=.001</b>       | 4.69 [.30-18.69];<br><b>p&lt;.001</b> | .98 [.07-9.36];<br>p>.999      | 1.24 [.29-8.41];<br>p>.999     |

Bile acid concentrations (median [min-max] µg/mg lyophilized feces), bile acid proportions (median [min-max] % of total bile acids), abundance of bacterial groups and toxins (median [min-max] LogSQ), and Dysbiosis Index (median [min-max]) in young dog age groups compared to adult dogs (>52 weeks) with Dunn's post test for multiple comparisons.
