# Supplementary material for: Developmental stages in microbiota, bile acids, and clostridial species in healthy puppies
Source: PubMed Central journal article supplement (PMC7694855; doi:10.1111/jvim.15928), 2020-10-13
Supplement: JVIM-34-2345-s004.pdf [file JVIM-34-2345-s004.pdf]

### C. perfringens enterotoxin gene

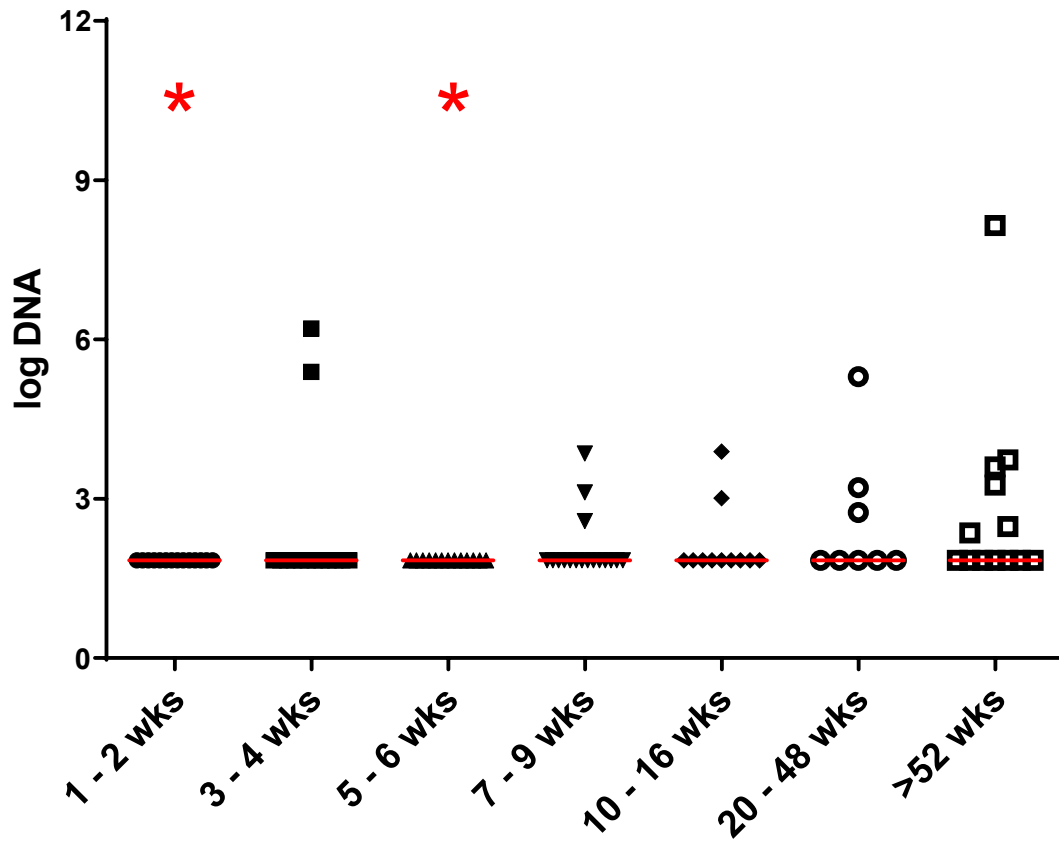

**Supplemental Figure 2.** Abundance (log DNA) of *Clostridium perfringens* enterotoxin gene. Red lines indicate medians and red asterisks indicate significance in comparison to adult dogs (i.e., dogs > 52 weeks of age;  $p < .05$ ).
